# Supplementary material for: Discovery of Antigens and Cellular Mechanisms in the Protozoan Parasite Sarcocystis aucheniae Using Immunoproteomics
Source: MDPI journal article supplement (doi:10.3390/parasitologia3040034), 2023-11-26
Supplement: s1 [file s1]

**Table S1.** *Sarcocystis aucheniae* proteins identified by immunoproteomics. The peptides identified in each of the selected immunoreactive bands are listed and characterized with respect to antigenicity, molecular weight, presence of signal peptide and/or transmembrane domains and homologous proteins in the coccidia *Toxoplasma gondii*, *Neospora caninum* and *Eimeria* sp.

| Protein band | MS ID | Antigenicity index | MW (kDa) | Topology <sup>1</sup> |         | Main conserved domain              | Genbank acc. number | Homologues       |                   |                                 |
|--------------|-------|--------------------|----------|-----------------------|---------|------------------------------------|---------------------|------------------|-------------------|---------------------------------|
|              |       |                    |          | TMHMM                 | SignalP |                                    |                     | <i>T. gondii</i> | <i>N. caninum</i> | <i>Eimeria</i> sp. <sup>2</sup> |
| 23 kDa       | 1     | 0.640261           | 116.5    | 0                     | Yes     | Peptidase_M16_M                    | OR538339            | XP_018636597     | XP_003882147      | XP_013233005                    |
|              | 3     | 0.625048           | 44.8     | 0                     | No      | -                                  | OR538333            | XP_002371248     | XP_003880749      | -                               |
|              | 4     | 0.377111           | 126.1    | 9                     | No      | E1-E2_ATPase                       | OR538364            | XP_002369362     | XP_003882467      | XP_013230267                    |
| 26 kDa       | 5     | 0.871654           | 30.1     | 0                     | No      | superoxide dismutase               | OR538365            | XP_002364798     | XP_003885488      | XP_013232304                    |
|              | 6     | 0.820947           | 28.1     | 0                     | No      | ubiquitin                          | OR538345            | XP_002367193     | XP_003886042      | XP_013233776                    |
|              | 7     | 0.900926           | 44.3     | 0                     | No      | HSP-70                             |                     | same as MS50     |                   |                                 |
| 33 kDa       | 8     | 0.910398           | 35.6     | 0                     | No      | PS decarboxylase                   |                     | same as MS15     |                   |                                 |
|              | 9     | 0.935031           | 30.5     | 0                     | No      | 14-3-3                             | OR538360            | XP_002365409     | XP_003882726      | XP_01322953                     |
|              | 10    | 0.842163           | 34.7     | 0                     | No      | PS decarboxylase                   |                     | same as MS15     |                   |                                 |
|              | 11    | 0.457649           | 18.2     | 0                     | No      | proteasome                         | OR538346            | XP_002370955     | XP_003885582      | XP_013228268                    |
|              | 12    | 0.354801           | 93.5     | 0                     | No      | trypsin                            | OR538340            | XP_002365392     | XP_003882743      | XP_013232558                    |
|              | 13    | 0.488969           | 56.2     | 0                     | No      | serpin                             | OR538351            | XP_002367021     | XP_003885915      | XP_013232835                    |
|              | 14    | 0.452299           | 23.1     | 0                     | No      | PS decarboxylase                   |                     | same as MS15     |                   |                                 |
|              | 15    | 0.643096           | 113.8    | 1                     | No      | PS decarboxylase                   | OR538353            | XP_018636598     | XP_003883917      | XP_003883907                    |
|              | 16    | 0.763341           | 41.2     | 0                     | No      | LCAT                               | OR538354            | XP_002365875     | XP_003883739      | XP_013228817                    |
|              | 17    | 0.839857           | 92.9     | 0                     | No      | elongation factor 2                | OR538344            | XP_002367778     | XP_003882268      | XP_013230121                    |
|              | 18    | 0.871646           | 31.8     | 0                     | No      | TUDOR                              | OR538355            | XP_002366497     | XP_003881785      | XP_013234110                    |
|              | 19    | 0.292976           | 35.8     | 0                     | No      | lactate dehydrogenase              | OR538363            | XP_002368105     | XP_003883478      | XP_013227905                    |
|              | 20    | 0.919246           | 75.4     | 0                     | No      | thioredoxin reductase              | OR538357            | XP_002364220     | XP_003884987      | XP_013234814                    |
|              | 21    | 0.910614           | 17.4     | 0                     | No      | SAG                                | OR538335            | XP_002365842     | XP_003881692      | -                               |
|              | 22    | 0.073894           | 232.9    | 0                     | No      | SAG                                | OR538334            | XP_002368595     | XP_003881008      | -                               |
|              | 23    | 0.894106           | 74.8     | 1                     | Yes     | HSP-70                             | OR538348            | XP_002364404     | XP_003885152      | XP_013228725                    |
| 38 kDa       | 24    | 0.476742           | 36.9     | 0                     | No      | GAPDH                              | OR538367            | XP_018636414     | XP_003881152      | XP_013234039                    |
|              | 26    | 0.869894           | 45.7     | 0                     | No      | fructose-1,6-bisphosphate aldolase | OR538361            | XP_002368989     | XP_003884639      | XP_013233987                    |
|              | 27    | 0.554836           | 28.9     | 0                     | No      | GAP45                              | OR538337            | XP_013232774     | XP_003884458      | XP_013233112                    |
| 73 kDa       | 29    | 0.695947           | 73.8     | 0                     | No      | leucyl aminopeptidase              | OR538341            | XP_018636441     | XP_003881232      | XP_013230932                    |
|              | 31    | 0.659780           | 68.7     | 0                     | Yes     | HSP-60                             | OR538347            | XP_002367122     | XP_003886122      | XP_013233964                    |
|              | 32    | 0.451268           | 75.7     | 1                     | No      | histidine acid phosphatase         | OR538358            | XP_002364164     | XP_003884942      | -                               |

|        |    |          |       |   |    |                                    |              |              |              |              |
|--------|----|----------|-------|---|----|------------------------------------|--------------|--------------|--------------|--------------|
| 45 kDa | 33 | 0.224609 | 15.5  | 0 | No | SAG                                | same as MS22 |              |              |              |
|        | 35 | 0.468109 | 40.9  | 0 | No | PS decarboxylase                   | same as MS8  |              |              |              |
|        | 36 | 0.360001 | 41.9  | 0 | No | PS decarboxylase                   | same as MS8  |              |              |              |
|        | 37 | 0.788678 | 120.5 | 0 | No | aminopeptidase                     | OR538342     | XP_002366120 | XP_003884424 | XP_013228001 |
|        | 38 | 0.570811 | 47.7  | 0 | No | DnAK-TPR                           | OR538359     | XP_002367488 | XP_003882527 | -            |
|        | 40 | 0.740474 | 42.7  | 0 | No | Peptidase_M16_M                    | same as MS1  |              |              |              |
|        | 43 | 0.928837 | 17.1  | 0 | No | S9 prolyl oligopeptidase           | OR538343     | XP_002369249 | XP_003881672 | XP_013229688 |
|        | 44 | 0.671182 | 16.5  | 0 | No | -                                  | OR538366     | -            | -            | -            |
|        | 48 | 0.926134 | 43.4  | 0 | No | Microneme protein                  | OR538336     | XP_002368836 | XP_003882956 | XP_013231935 |
|        | 50 | 0.767948 | 31.8  | 0 | No | HSP-70                             | OR538349     | XP_002365977 | XP_003883640 | XP_013228725 |
|        | 53 | 0.367677 | 11.4  | 0 | No | fructose-1,6-bisphosphate aldolase | same as MS26 |              |              |              |
|        | 54 | 0.571094 | 42.8  | 0 | No | fructose-1,6-bisphosphatase        | OR538352     | XP_018637277 | XP_003882277 | XP_013230653 |
|        | 56 | 0.719983 | 16.8  | 0 | No | GRA9                               | OR538338     | -            | -            | XP_013246603 |
|        | 57 | 0.583050 | 83.3  | 0 | No | HSP-90                             | OR538350     | XP_002368278 | XP_003881046 | XP_013232120 |
|        | 58 | 0.759219 | 90.4  | 1 | No | chromosome segregation protein     | OR538356     | XP_002365650 | XP_003883933 | -            |
|        | 60 | 0.469385 | 48.4  | 0 | No | enolase                            | OR538362     | XP_002365578 | XP_003884000 | XP_013229351 |

<sup>1</sup> None of the identified proteins had a GPI anchor signal; <sup>2</sup> All accession numbers for *Eimeria* sp. correspond to *E. tenella* with the exception of the homologue of protein 56 which was found in *E. acervulina*.
